# Supplementary material for: Nonrapid eye movement sleep and risk for autism spectrum disorder in early development: A topographical electroencephalogram pilot study
Source: PubMed Central journal article supplement (PMC7066345; doi:10.1002/brb3.1557), 2020-02-09
Supplement: BRB3-10-e01557-s001.pdf [file BRB3-10-e01557-s001.pdf]

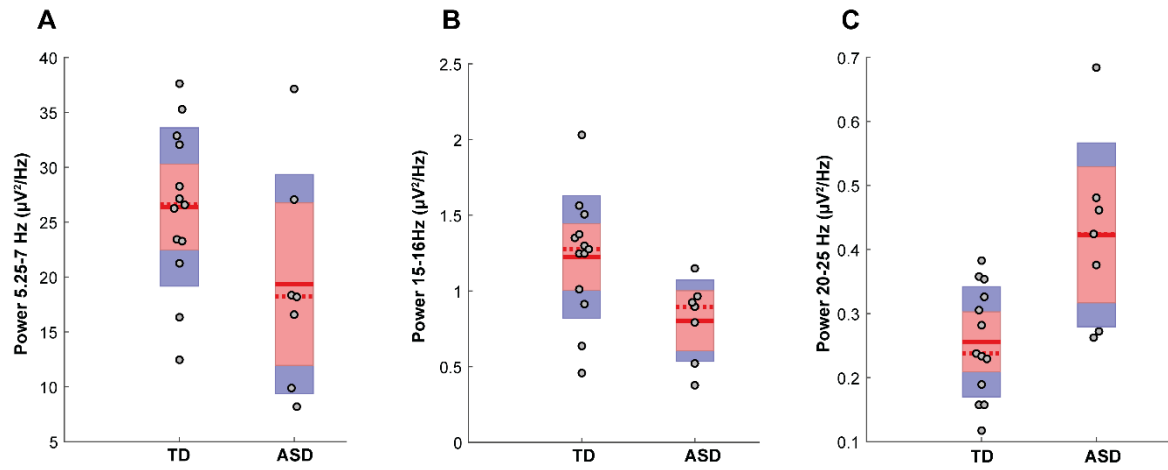

**Figure S1:** Error bars and individual participant plots for the robust significant clusters marked in Figures 2 and 4. Plots illustrate mean (solid red line), median (red dashes line), 95% confidence interval around the mean (red shaded area) and standard deviation (blue shaded are). Points illustrate the spectral power values for each individual.
